# Supplementary material for: Exploring Nitric Oxide as a Regulator in Salt Tolerance: Insights into Photosynthetic Efficiency in Maize
Source: MDPI journal article supplement (doi:10.3390/plants13101312), 2024-05-10
Supplement: s1 [file s1]

## Exploring Nitric Oxide as a Regulator in Salt Tolerance: Insights into Photosynthetic Efficiency in Maize

Georgi D. Rashkov, Martin A. Stefanov, Ekaterina K. Yotsova, Preslava B. Borisova, Anelia G. Dobrikova and Emilia L. Apostolova \*

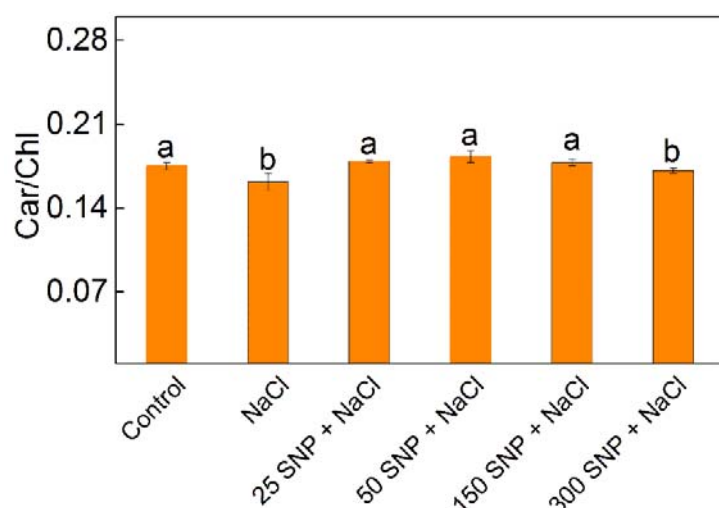

**Figure S1.** Impact of SNP on the total chlorophyll to carotenoid ratio of maize (*Zea mays* L. Kerala) under salt stress. The mean values ( $\pm$ SE) were calculated from 8 independent measurements. Significant differences between variants at  $p < 0.05$  are marked by different letters

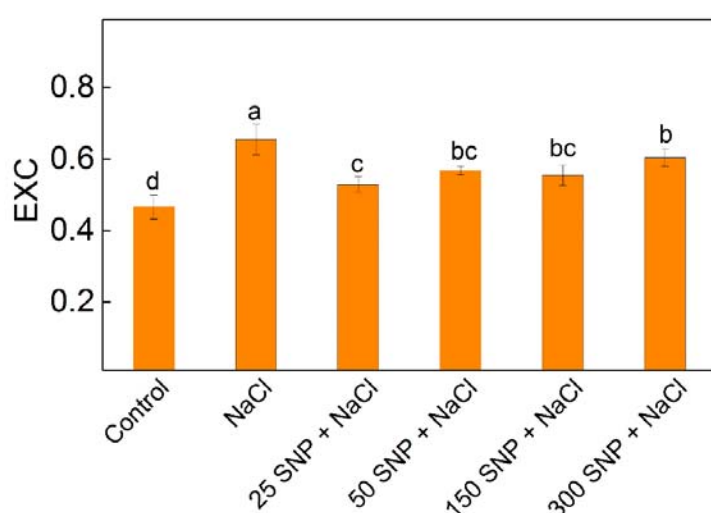

**Figure S2.** Effects of different SNP levels on excess excitation energy (EXC) in the leaves of one maize variety (*Zea mays* L. Kerala) during salt stress. We determined mean values ( $\pm$ SE) for 8 independent measurements. Significant differences between treatments at  $p < 0.05$  are denoted by different letters.

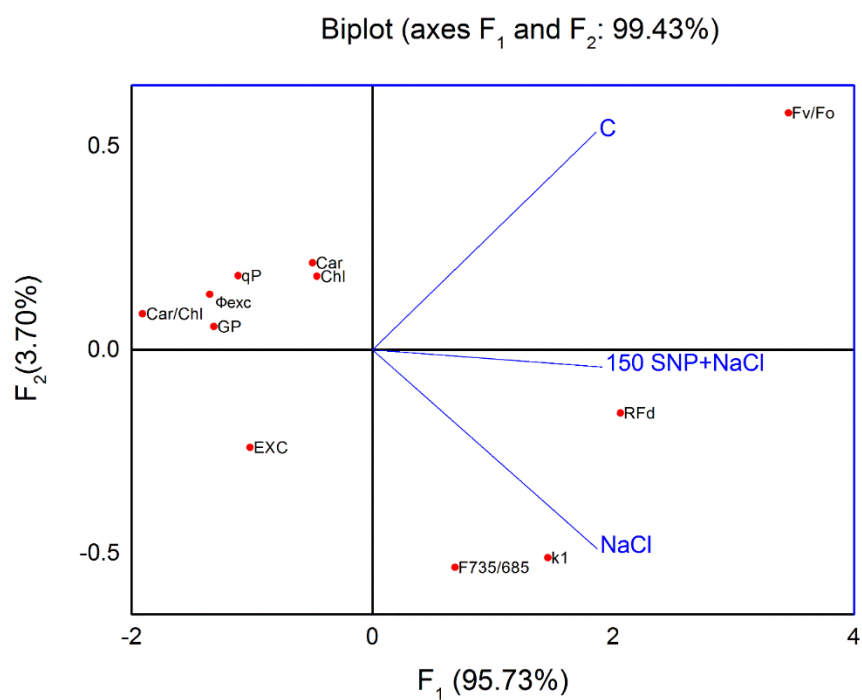

**Figure S3.** Principal component analysis (PCA) shows variation in the selected parameters after treatment with NaCl alone and co-treatment SNP and NaCl: PAM and 77K chlorophyll fluorescence, pigment content and thylakoid membrane fluidity.

**Table S1.** Variable contributions (loadings) for the principal component analysis model in Figure 1S.

| Parameters    | F1     | F2     |
|---------------|--------|--------|
| $F_{735/685}$ | 0.686  | -0.535 |
| Fv/Fo         | 3.456  | 0.582  |
| $R_{Fd}$      | 2.060  | -0.155 |
| qP            | -1.115 | 0.182  |
| EXC           | -1.015 | -0.240 |
| Car/Chl       | -1.908 | 0.089  |
| Chl           | -0.459 | 0.181  |
| Car           | -0.498 | 0.214  |
| $k_1$         | 1.459  | -0.511 |
| GP            | -1.316 | 0.057  |
